# Supplementary material
Source: publisher site journal article supplement (https://www.dovepress.com/article/498739)
Supplement: Supplementary file 1 [file get_supplementary_file.php]

**Supplementary Figure 1**


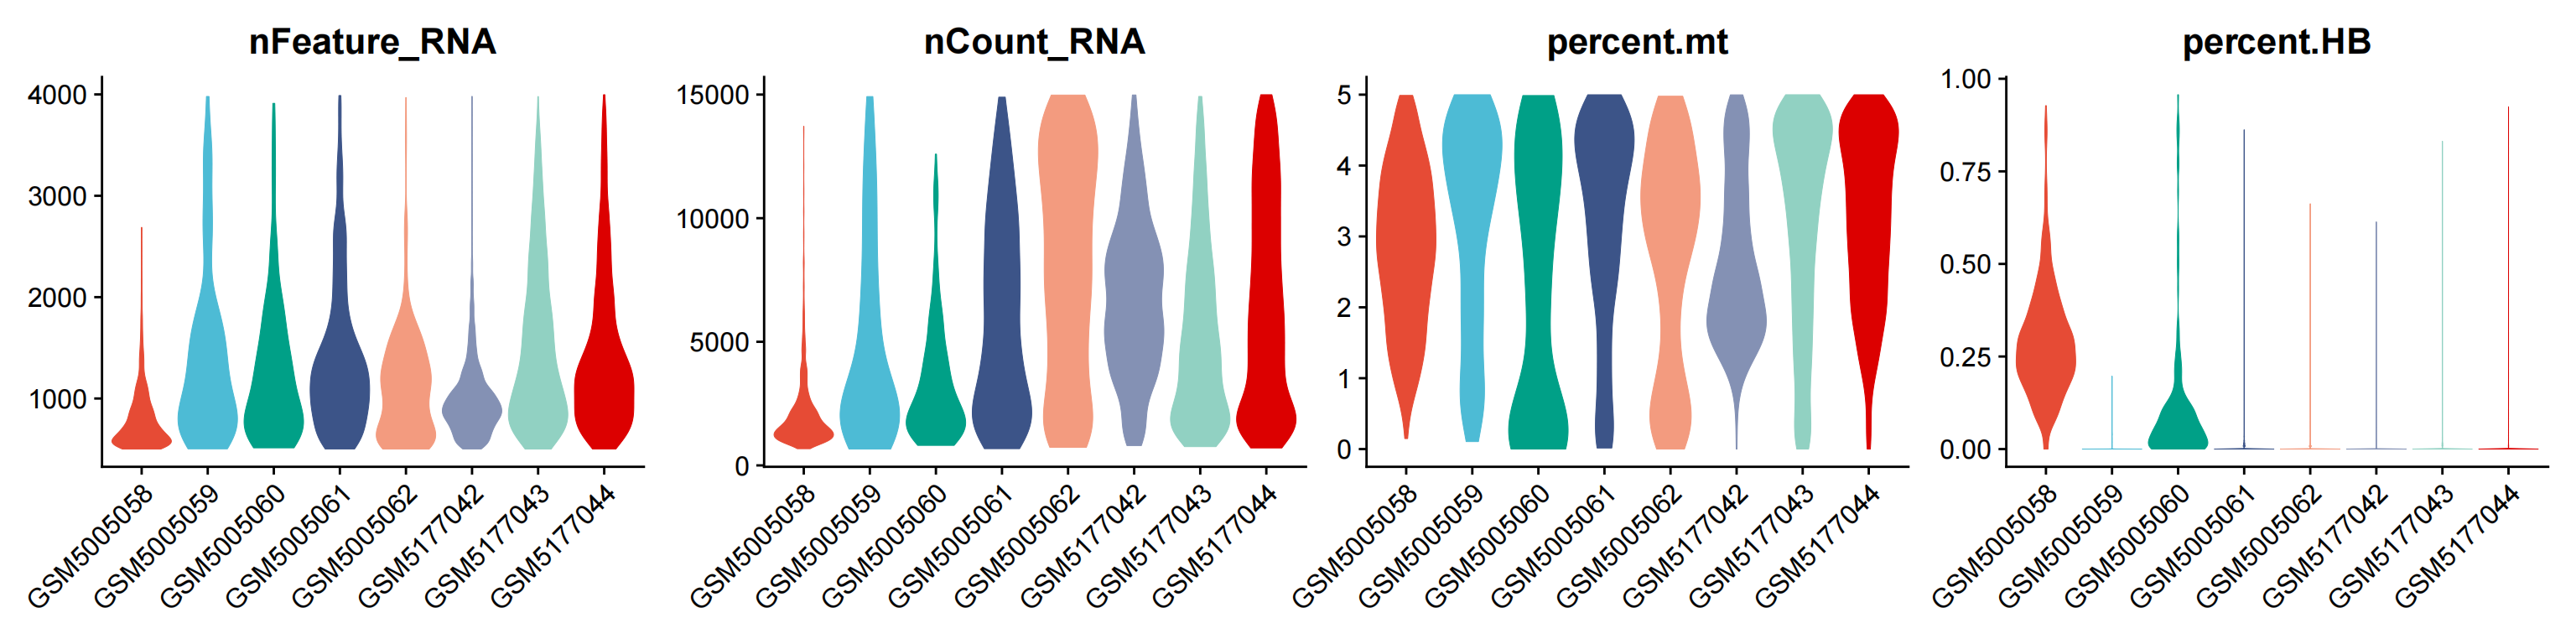


Violin Plots of Pre-Quality-Control Metrics (nFeature_RNA, nCount_RNA, percent.mt, percent.HB) for Individual Samples

**Supplementary Figure 2**


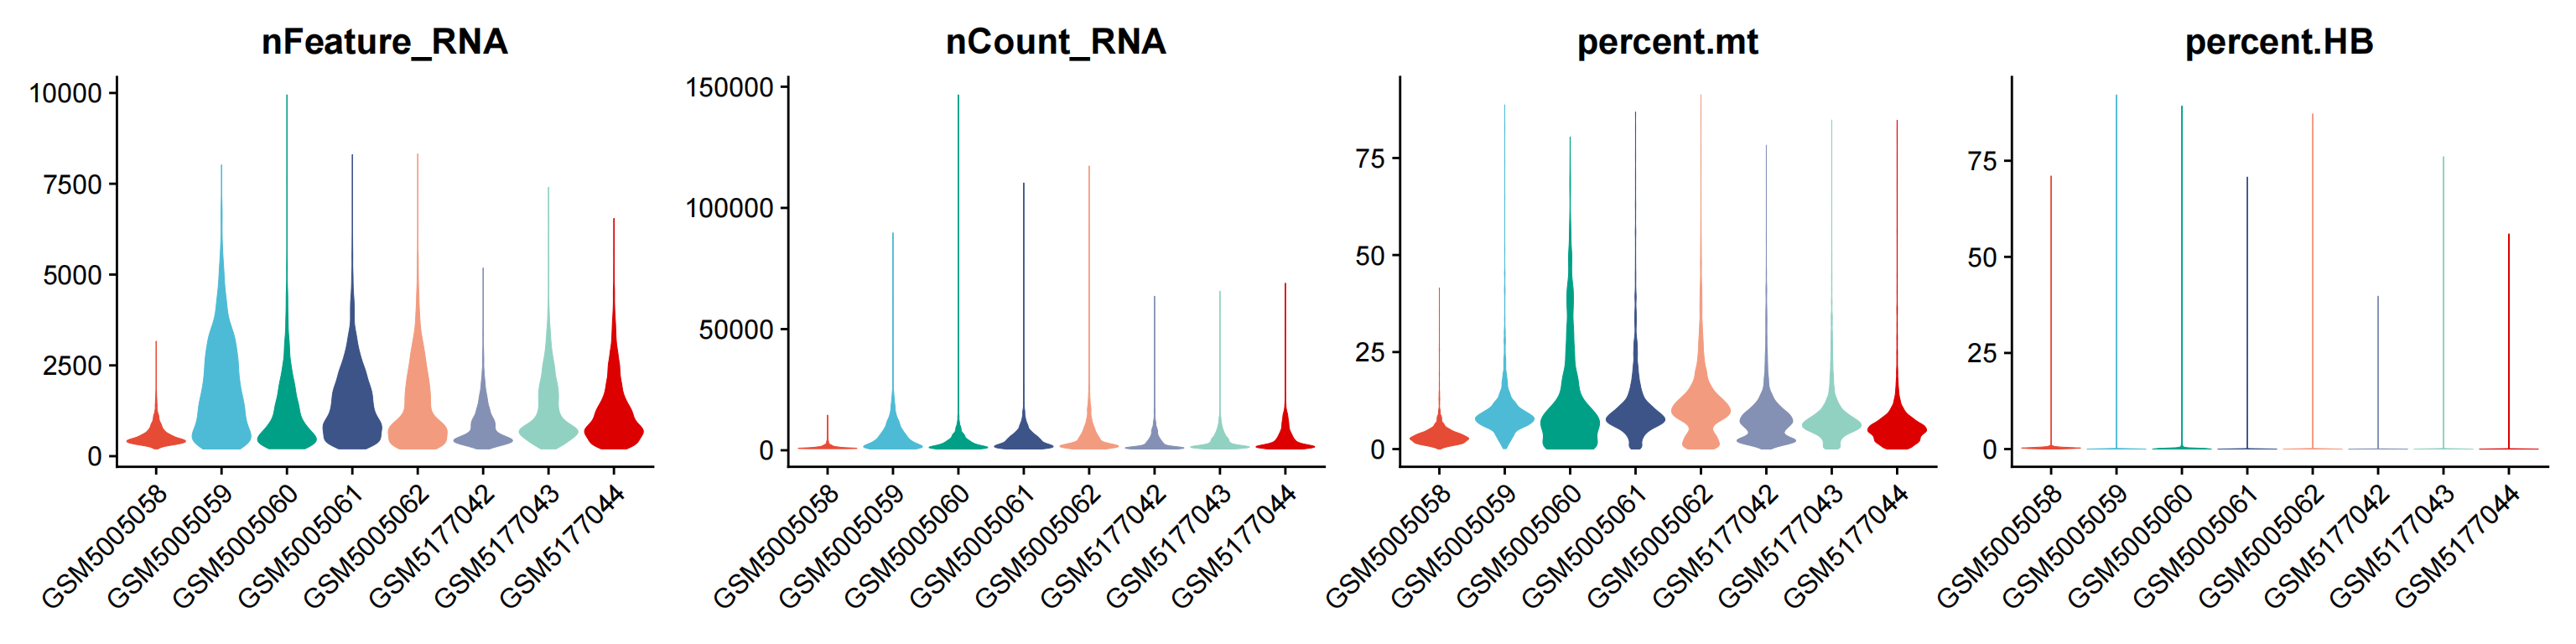


Extended Violin Plots of Post-Quality-Control Metrics for Additional Datasets (nFeature_RNA, nCount_RNA, percent.mt, percent.HB)

**Supplementary Table 1**

| **Gene Category** | **Gene Symbols** |
| --- | --- |
| **Macrophage-Associated Genes** | SRGN, CTSS, LCP1, PLEK, LAPTM5, FTL, CD14, FCER1G, IL1B, C1QA, HLA-DMA, MMP9, RGS2, C1QC, G0S2, CXCL8, GZMB, C1QB, BCL2A1, HLA-DRA, CXCL3, PTGS2 |
| **Mitochondrial-Associated Genes** | CYP24A1, FAHD1, PRDX4, GLDC, BNIP3, UNG, CBR3, UCP2, TMEM205, SLC25A43, ARMCX3, PDK1, BCL2A1, IFI27 |

**Table 1. Differentially Expressed Macrophage- and Mitochondrial-Related Genes in Periodontitis**
